# Supplementary material for: BACE1 Inhibition Using 2’-OMePS Steric Blocking Antisense Oligonucleotides
Source: PubMed Central journal article supplement (PMC6770983; doi:10.3390/genes10090705), 2019-09-12

# BACE1 inhibition using 2'-OMePS steric blocking antisense oligonucleotides.

Madhuri Chakravarthy and Rakesh N Veedu

## Results

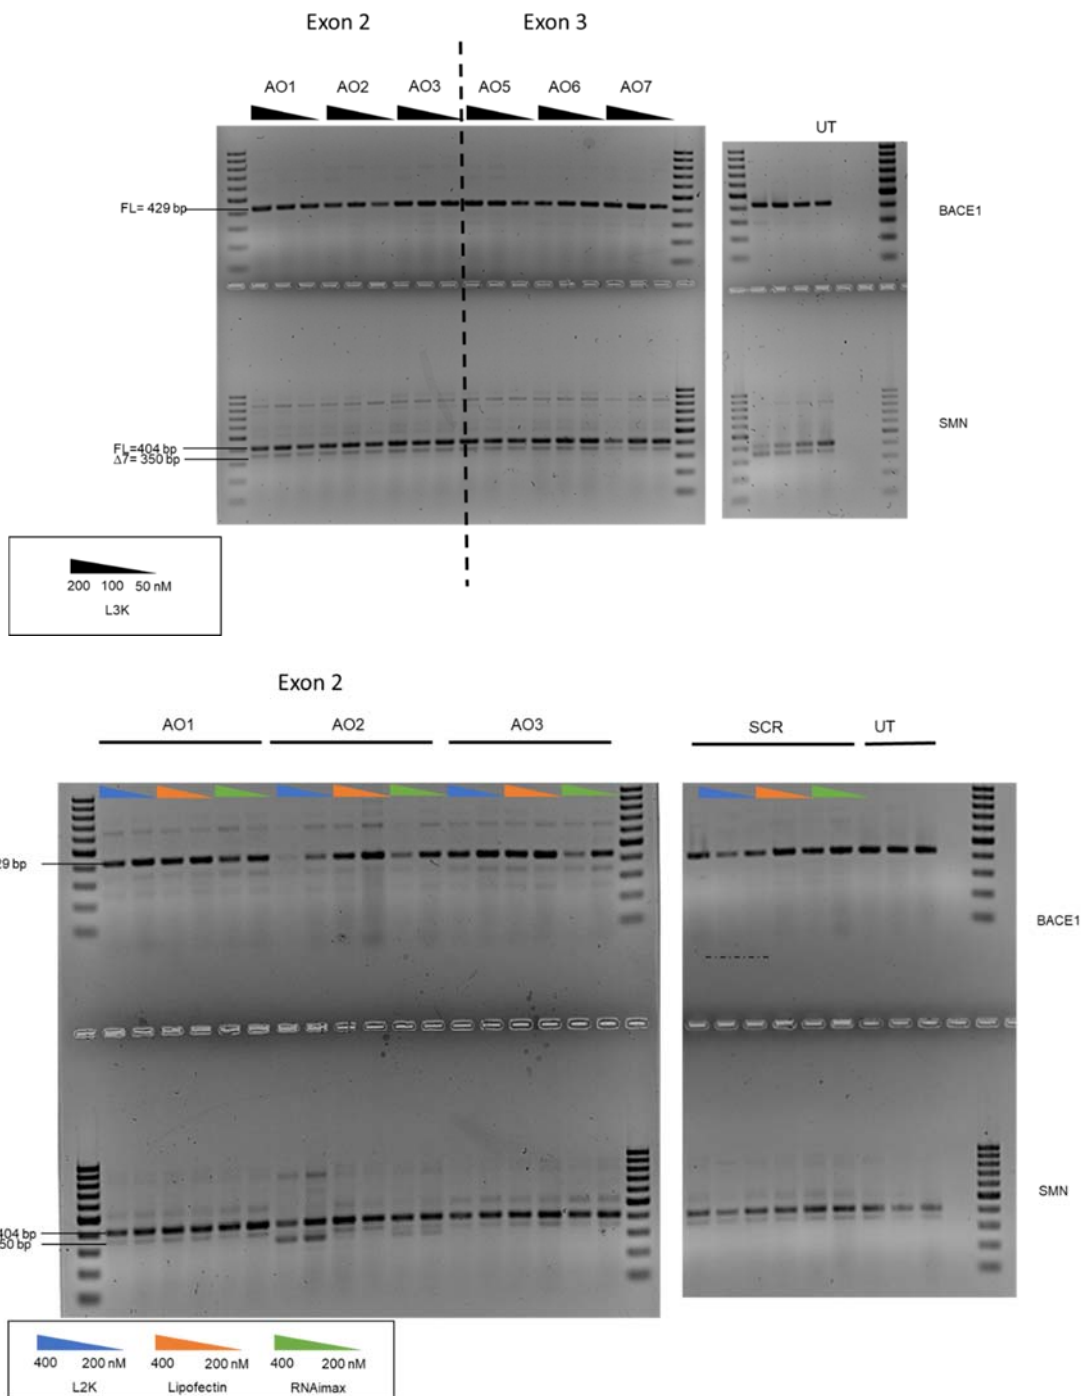

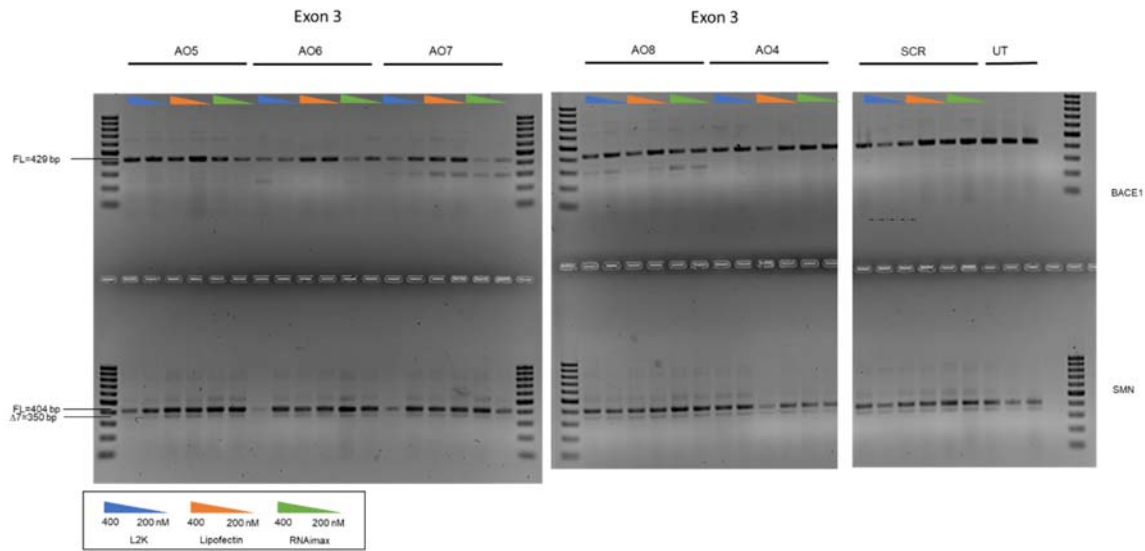

**Figure S1.** The RT-PCR products after treatment with AO1, AO2, AO3, AO4, AO5, AO6, AO7, and AO8. The AOs were treated using a variety of transfection reagents including Lipofectamine 3000, Lipofectamine 2000, Lipofectamine RNAimax, and Lipofectin according to the manufacturer's protocol. FL, full-length; SMN was used as a loading control; SCR, Scrambled or Gene tools control was used as a control. .

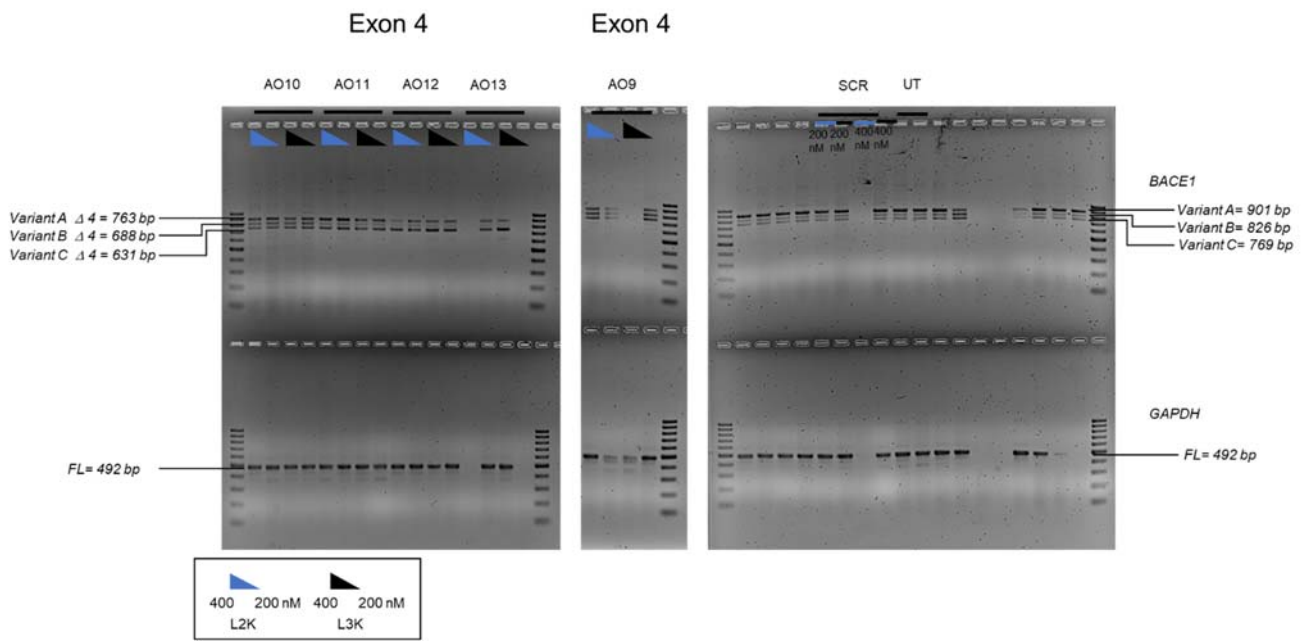

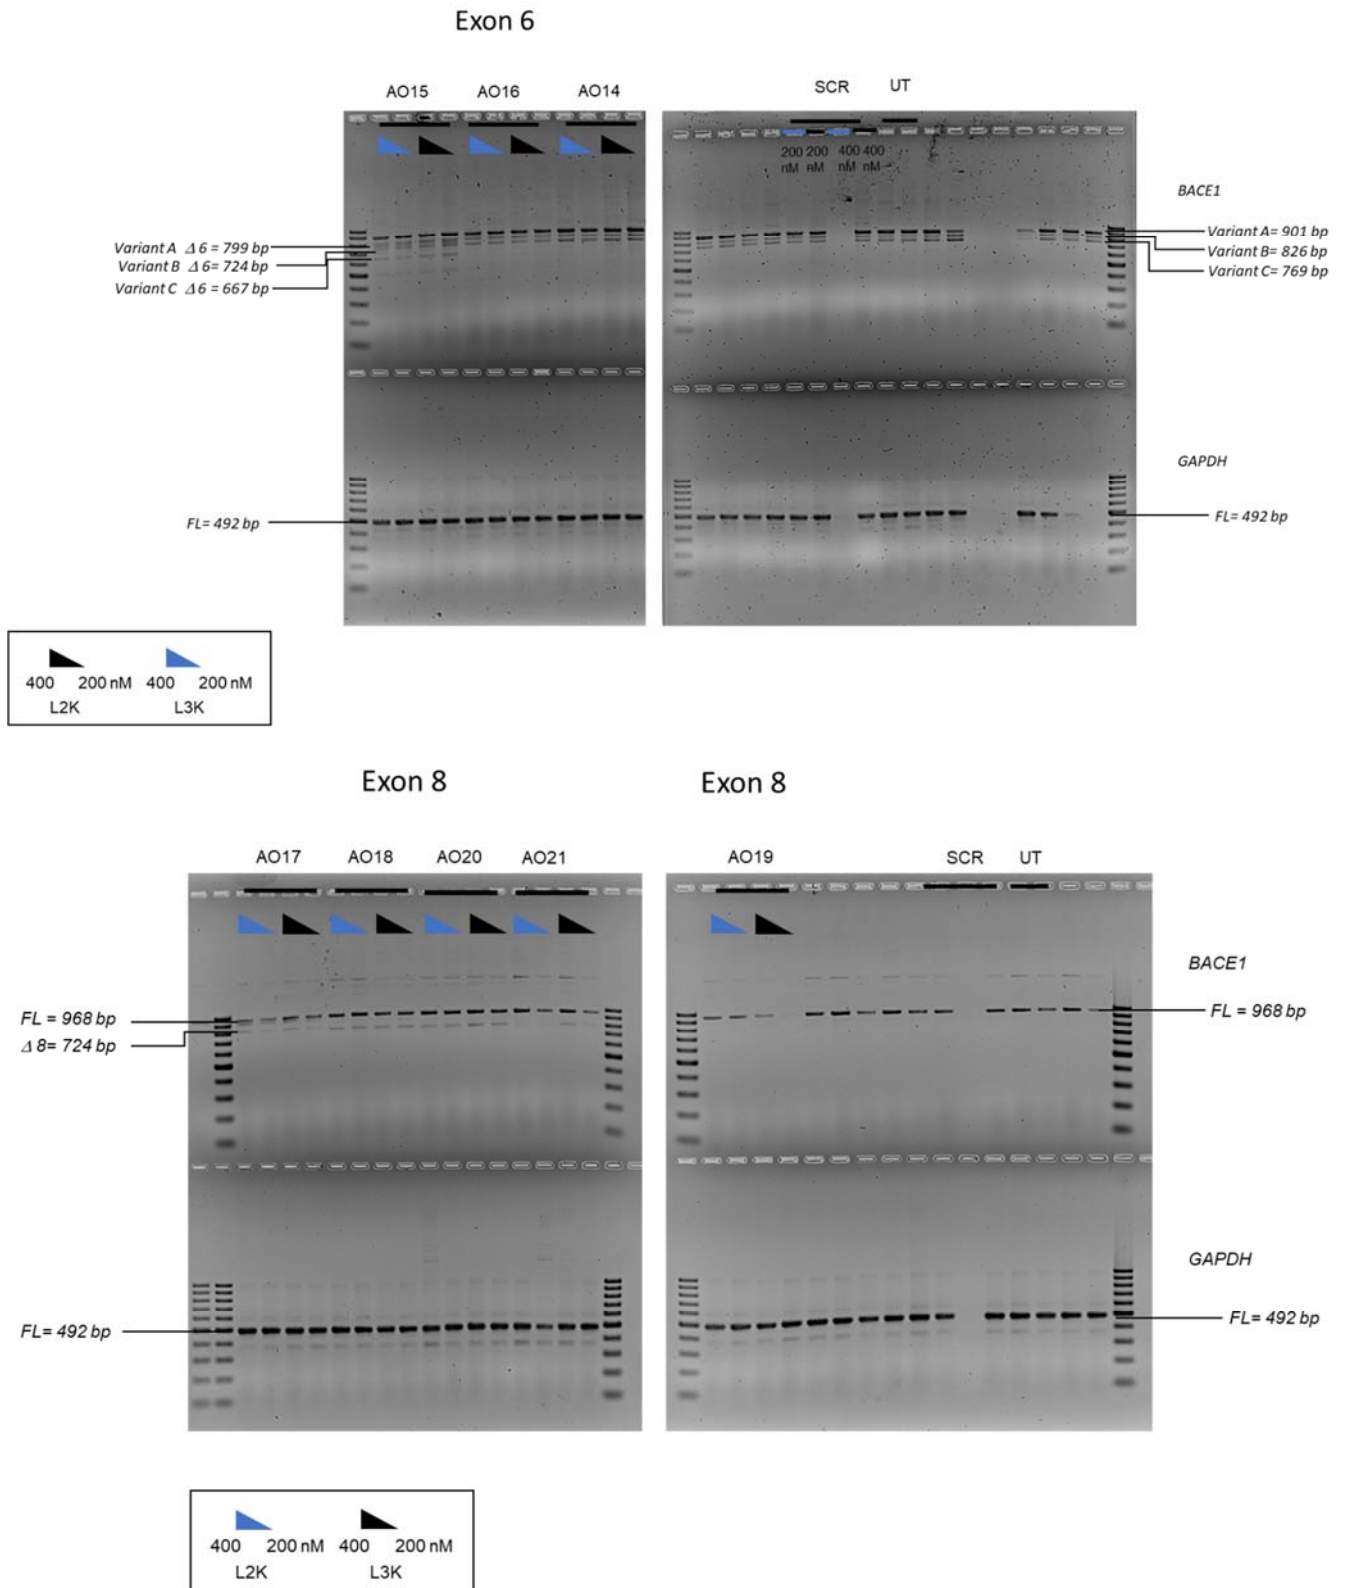

**Figure S2.** The RT-PCR products after treatment with AO9, AO10, AO11, AO12, AO13, AO14, AO15, AO16, AO17, AO18, AO19, AO20 and AO21. The AOs were treated using a variety of transfection reagents including Lipofectamine 3000 and Lipofectamine 2000 according to the manufacturer's protocol. FL, full-length; *GAPDH* was used as a loading control; SCR, Scrambled or Gene tools control was used as a control. .

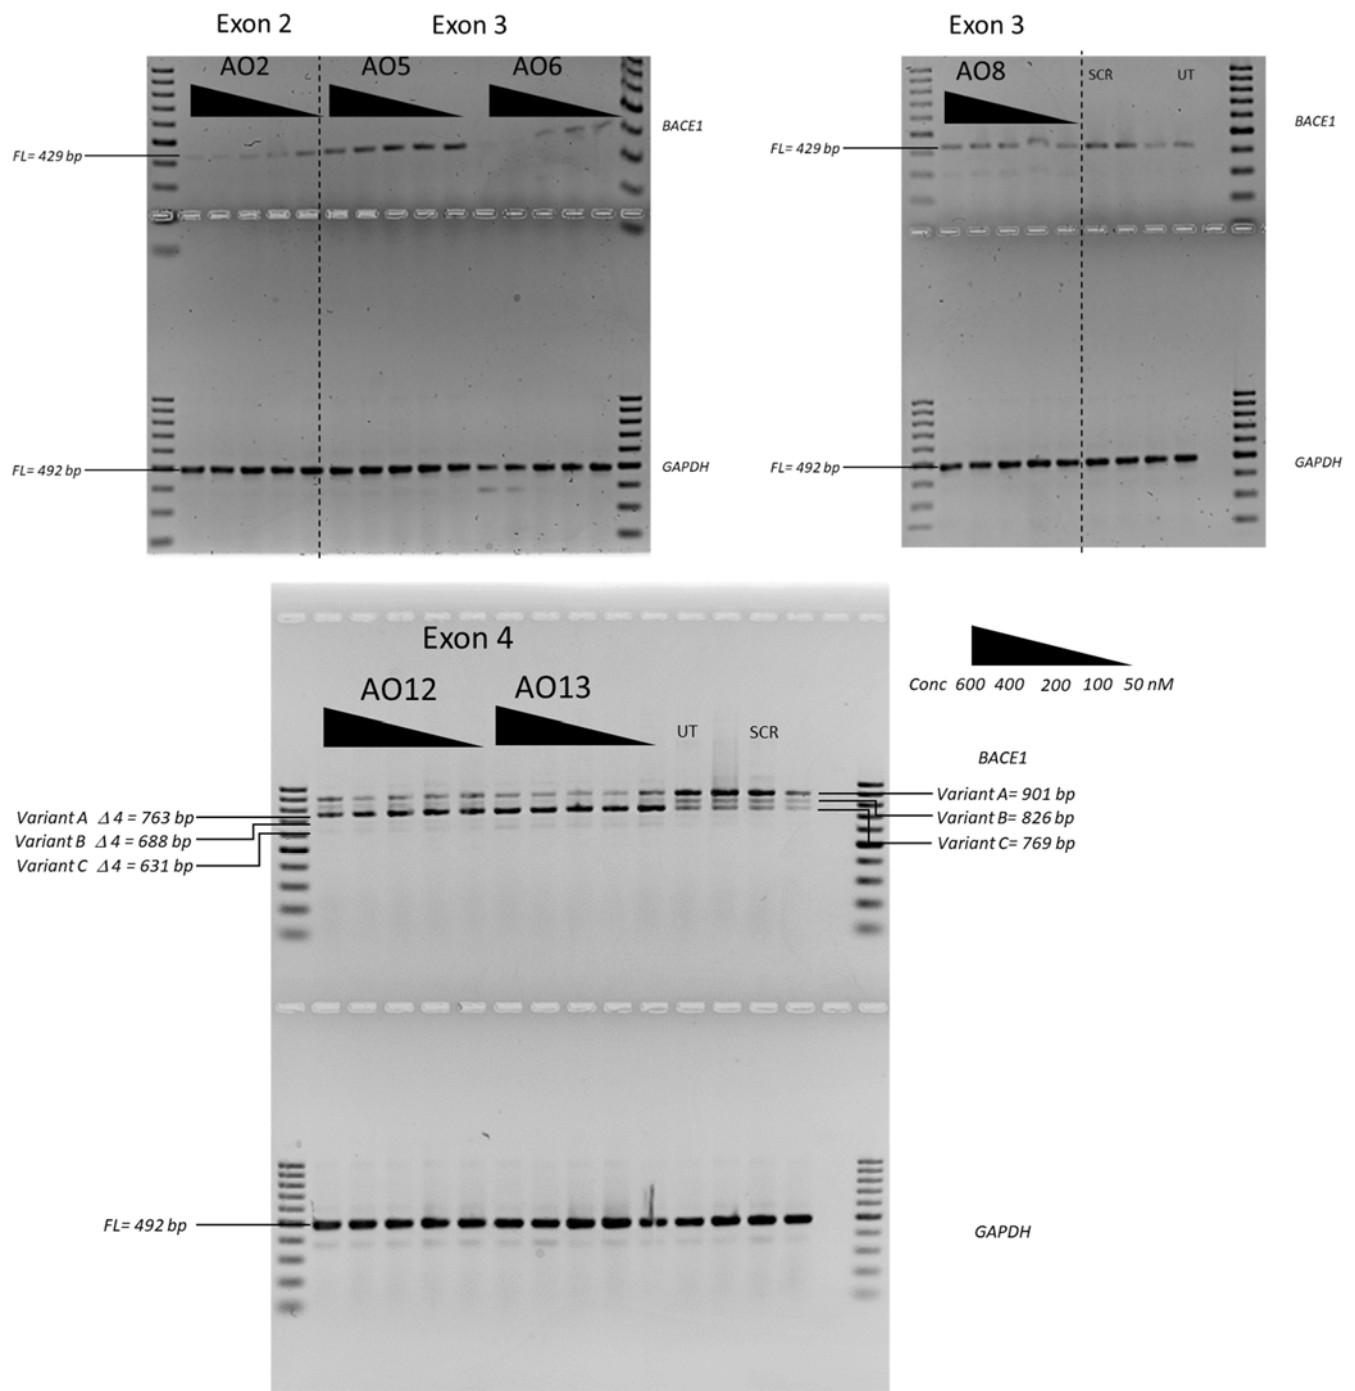

**Figure S3.** The RT-PCR products after treatment with AO2, AO5, AO6, AO8, AO12 and AO13. FL, full-length; *GAPDH* was used as a loading control; SCR, Scrambled or Gene tools control was used as a control. [The gel in this figure is the original gel representing the gel in Figure 2 of the article. The cropped gel has been shown in Figure 2 of the article due to other unimportant samples that exist between the desired samples].

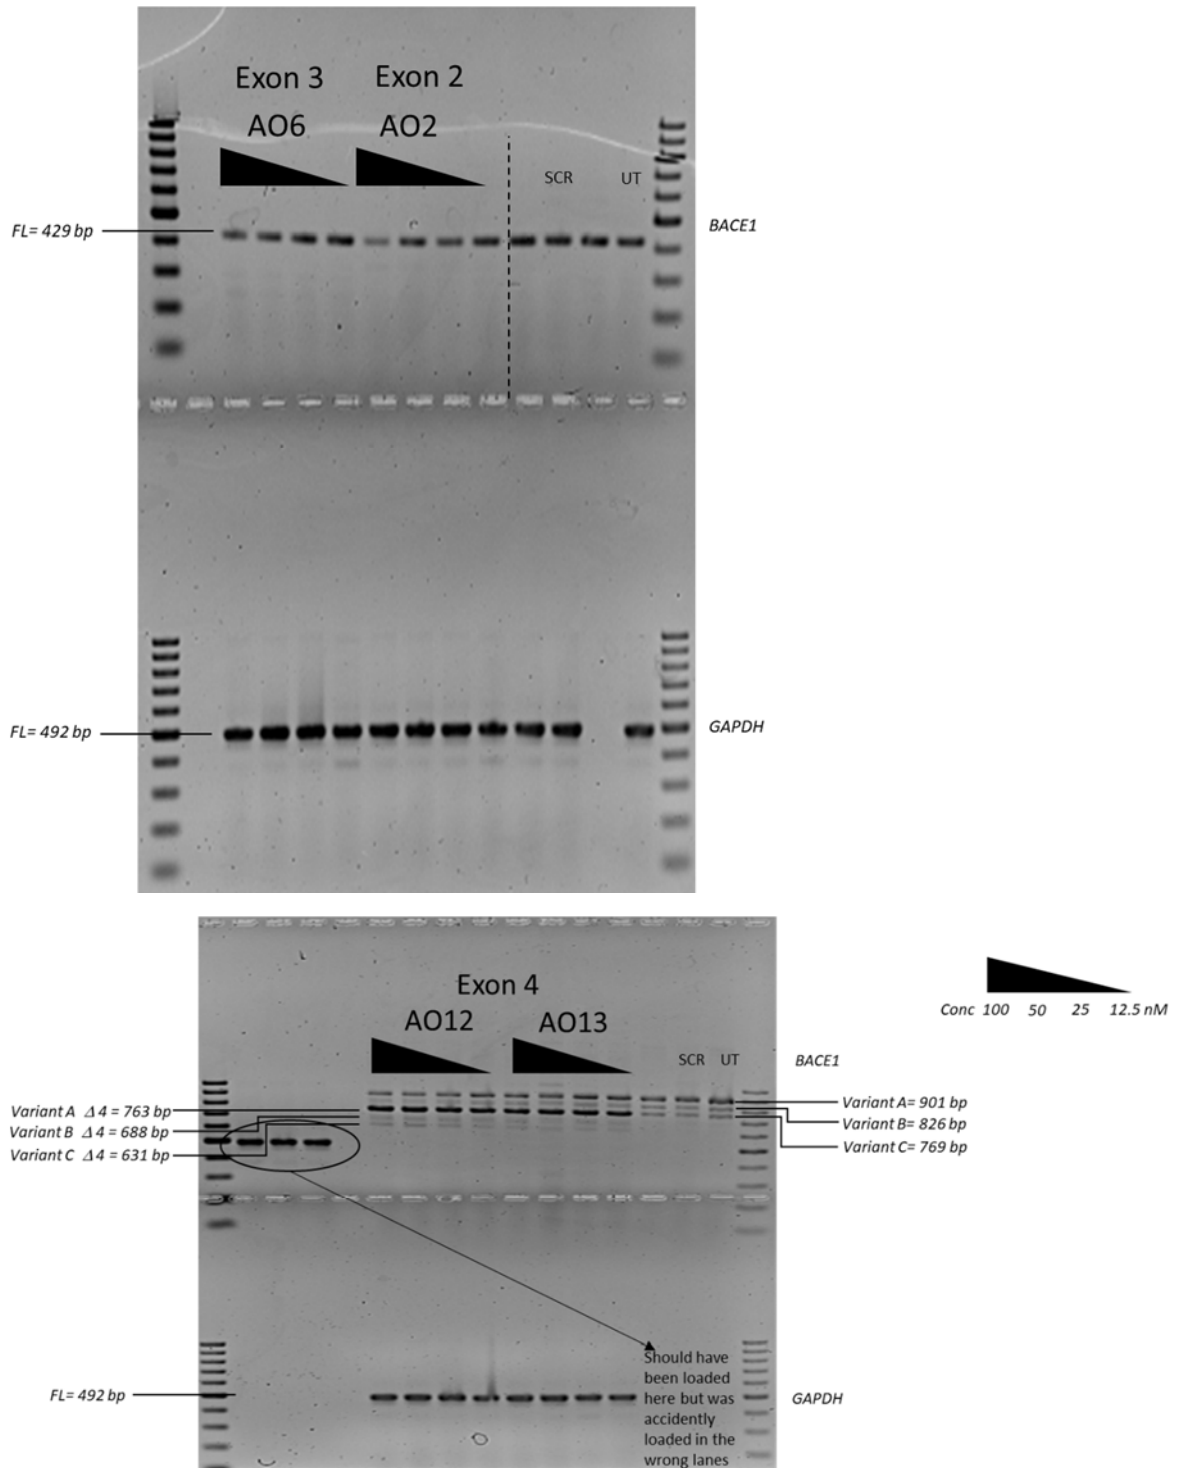

**Figure S4.** The RT-PCR products after treatment with AO2, AO6, AO12, and AO13. FL, full-length; *GAPDH* was used as a loading control; SCR, Scrambled or Gene tools control was used as a control. [The gel in this figure is the original gel representing the gel in Figure 3 of the article. The cropped gel has been shown in Figure 3 of the article due to other unimportant samples that exist between the desired samples and the samples loaded in the wrong wells.].

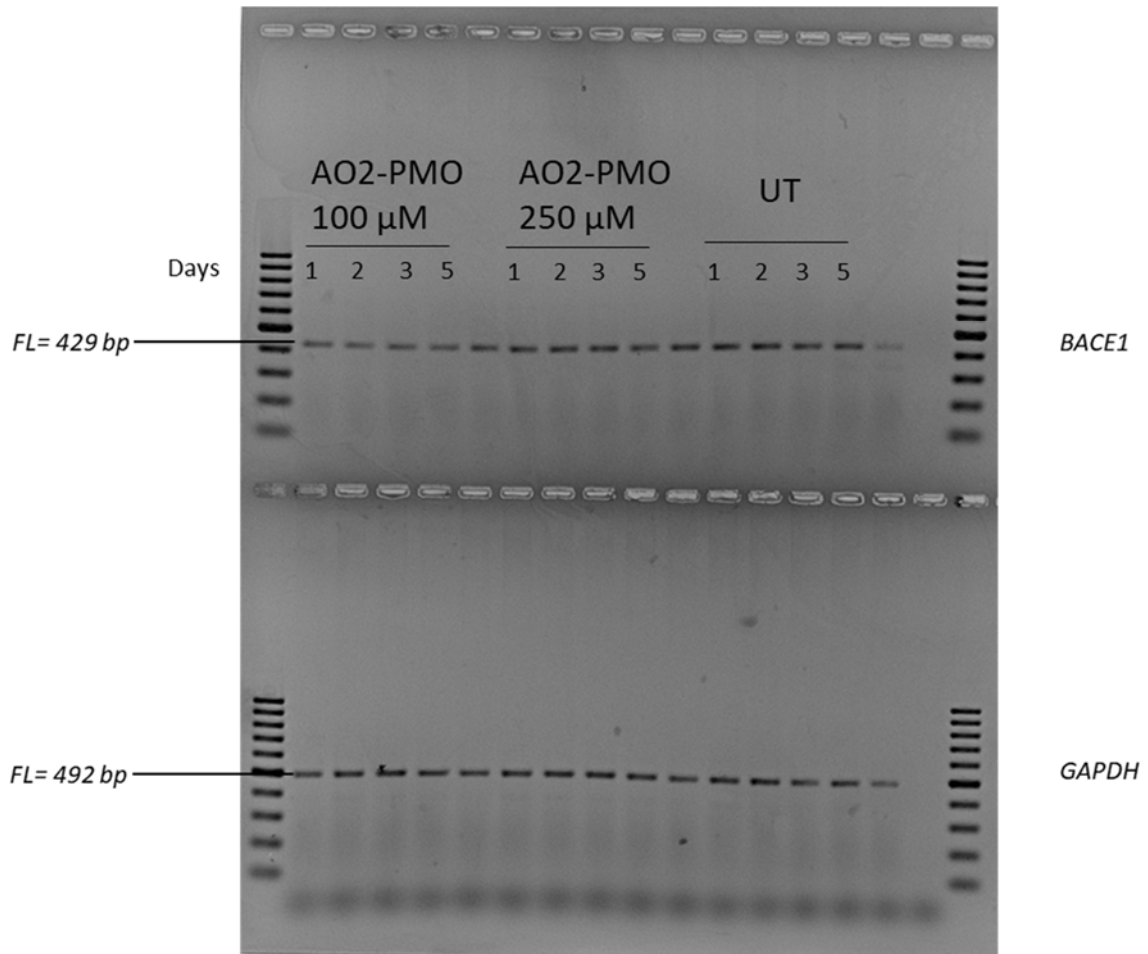

**Figure S5.** The RT-PCR products after treatment with AO2-PMO. FL, full-length; *GAPDH* was used as a loading control. SCR, Scrambled or Gene tools control was used as a control. [The gel in this figure is the original gel representing the gel in Figure 5 of the article. The cropped gel has been shown in Figure 5 of the article due to other unimportant samples that exist between the desired samples.].

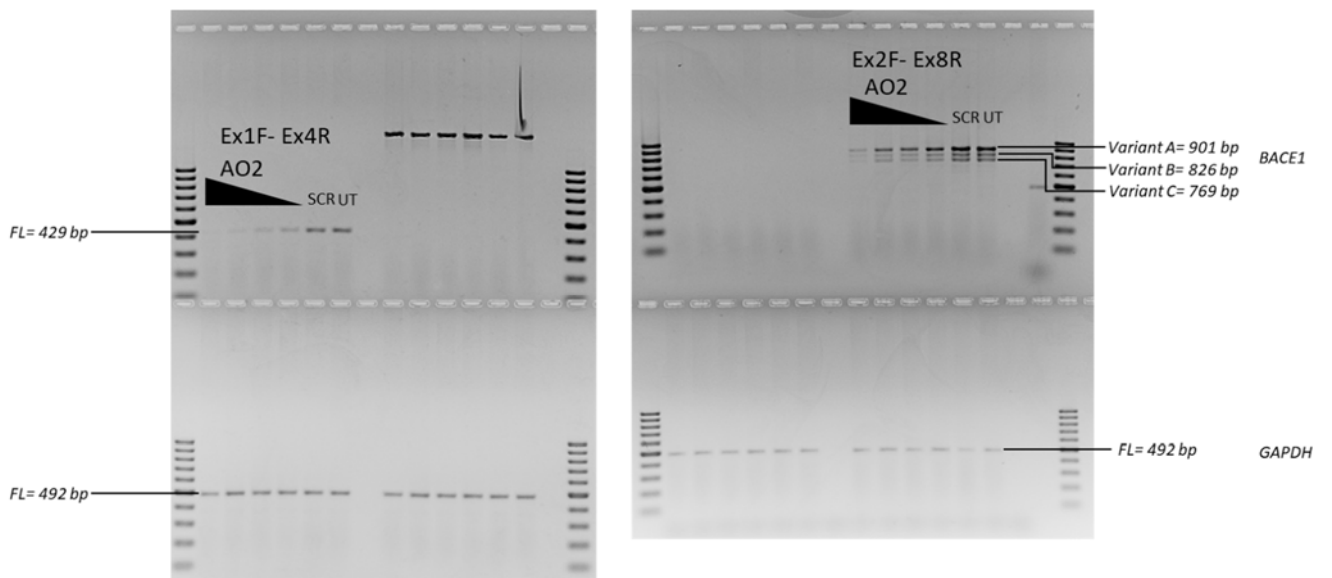

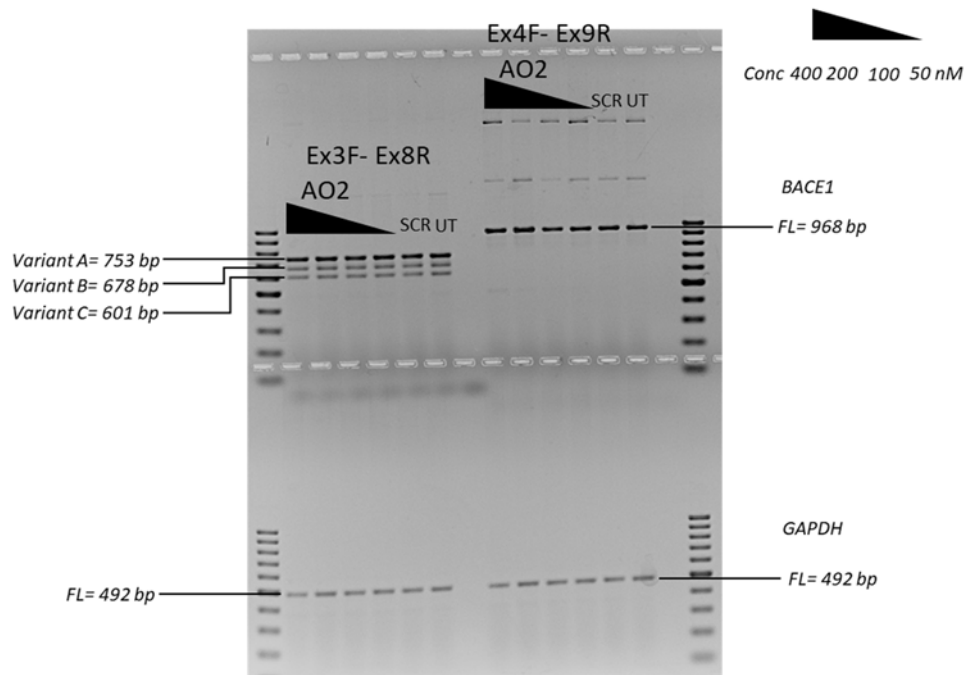

**Figure S6.** The RT-PCR products after AO2 treatment amplified using different primer sets. FL, full-length; *GAPDH* was used as a loading control; SCR, Scrambled or Gene tools control was used as a control. [The gel in this figure is the original gel representing the gel in Figure 6 of the article. The cropped gel has been shown in Figure 6 of the article due to other unimportant samples that exist between the desired samples and nonspecific bands that exist.]

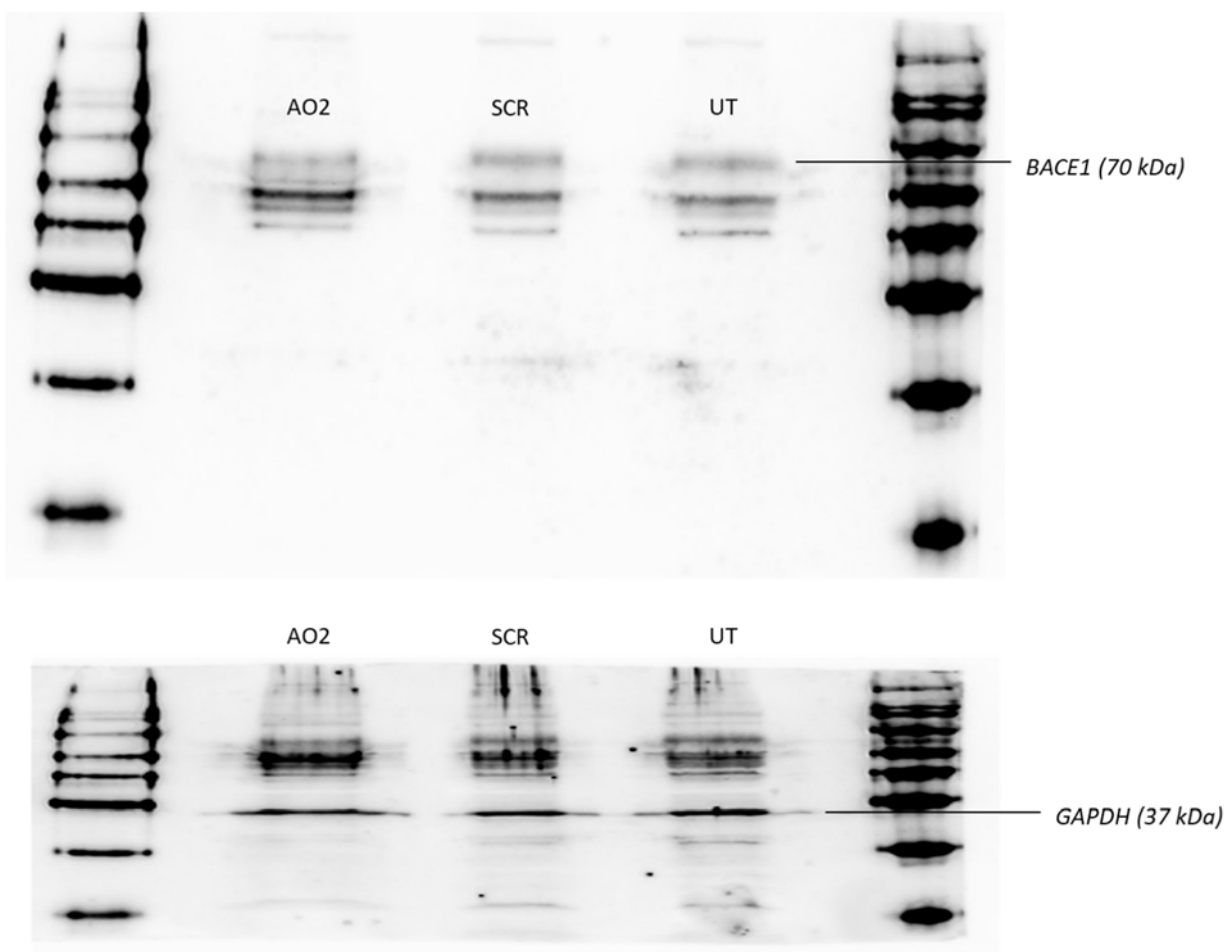

**Figure S7.** The western blot membranes after AO2 treatment incubated with anti-BACE1 antibody (top membrane) and anti-GAPDH antibody (bottom membrane). *GAPDH* was used as a loading control; SCR, Scrambled or Gene tools control was used as a control. [The membrane in this figure is the original membrane representing the membrane in Figure 7 of the article. The cropped membrane has been shown in Figure 6 of the article due to other nonspecific bands that exist.].

## Methods:

**Table S1.** The seeding density of HEK293 cells used for different assays.

| Assay          | Plate or Flask?          | Seeding density     |
|----------------|--------------------------|---------------------|
| RNA Extraction | 24 well plate            | 50,000 cells/well   |
| Western Blot   | T25cm <sup>2</sup> flask | 625,000 cells/flask |
| Nucleofection  | 24 well plate            | 100,000 cells/well  |

**Table S2.** The primer sets used to amplify *BACE1* transcript.

| Primer sets         | Primer pairs | Primer Sequences           | Expected size                                               |
|---------------------|--------------|----------------------------|-------------------------------------------------------------|
| <b>Primer Set 1</b> | BACE1_Ex1Fa  | 5' GACAACCTGAGGGGCAAGTC 3' | 429 bp                                                      |
|                     | BACE1_Ex4R   | 5' AACGTGGGTCTGCTTTACCA 3' |                                                             |
| <b>Primer Set 2</b> | BACE1_Ex2F   | 5' ACCAAAGTGAACCACGGAGG 3' | 968 bp                                                      |
|                     | BACE1_Ex8R   | 5' TCTGGTAAAGCAGACCCACG 3' |                                                             |
| <b>Primer Set 3</b> | BACE1_4F     | 5' GGCAGCAGTAACTTTGCAGT 3' | Variant A= 901 bp<br>Variant B= 826 bp<br>Variant C= 769 bp |
|                     | BACE1_Ex9R   | 5' CCATAACAGTGCCCGTGGAT 3' |                                                             |
| <b>Primer Set 4</b> | BACE1_Ex3F   | 5' ACCTGGTAAGCATCCCCCAT 3' | Variant A= 753 bp<br>Variant B= 678 bp<br>Variant C= 601 bp |
|                     | BACE1_Ex8R   | 5' TCTGGTAAAGCAGACCCACG 3' |                                                             |

**Table 3.** The primer sets used to amplify *GAPDH* transcript.

| GAPDH Primer set    | Primer pairs | Primer Sequences           | Expected product length |
|---------------------|--------------|----------------------------|-------------------------|
| <b>Primer Set 1</b> | GAPDH        | 5' GGACTCATGACCACAGTCCATGC | 492 bp                  |
|                     | For          | 3'                         |                         |
|                     | GAPDH        | 5' TTACTCCTTGGAGGCCATGTGGG |                         |
|                     | Rev          | 3'                         |                         |

**Table 4.** The PCR conditions for each primer set.

| Primer pairs                                                            | PCR Conditions |        |
|-------------------------------------------------------------------------|----------------|--------|
|                                                                         | Temperature    | Time   |
| <b>BACE1 Primer set<br/>(25 ng each)<br/>BACE1_Ex1Fa<br/>BACE1_Ex4R</b> | 55°C           | 30 min |
|                                                                         | 94°C           | 2 min  |
|                                                                         | 94°C           | 30 s   |
|                                                                         | 58°C           | 1 min  |
|                                                                         | 68°C           | 2 min  |
| <b>BACE1 Primer set<br/>(25 ng each)<br/>BACE1_Ex2F<br/>BACE1_Ex8R</b>  | Temperature    | Time   |
|                                                                         | 55°C           | 30 min |
|                                                                         | 94°C           | 2 min  |
|                                                                         | 94°C           | 30 s   |
|                                                                         | 55°C           | 1 min  |
| <b>BACE1 Primer set<br/>(25 ng each)<br/>BACE1_4F</b>                   | 68°C           | 2 min  |
|                                                                         | Temperature    | Time   |
|                                                                         | 55°C           | 30 min |
|                                                                         | 94°C           | 2 min  |



|                                                            |                    |             |           |
|------------------------------------------------------------|--------------------|-------------|-----------|
| BACE1_Ex9R                                                 | 94°C               | 30 s        | 28 cycles |
|                                                            | 60°C               | 1 min       |           |
|                                                            | 68°C               | 2 min       |           |
| BACE1 Primer set<br>(25 ng each)<br>BACE1_3F<br>BACE1_Ex8R | <b>Temperature</b> | <b>Time</b> | 30 cycles |
|                                                            | 55°C               | 30 min      |           |
|                                                            | 94°C               | 2 min       |           |
|                                                            | 94°C               | 30 s        |           |
|                                                            | 60°C               | 1 min       |           |
|                                                            | 68°C               | 2 min       |           |
| GAPDH Primer set (12.5 ng each)<br>GAPDH For<br>GAPDH Rev  | <b>Temperature</b> | <b>Time</b> | 18 cycles |
|                                                            | 55°C               | 30 min      |           |
|                                                            | 94°C               | 2 min       |           |
|                                                            | 94°C               | 30 s        |           |
|                                                            | 60°C               | 1 min       |           |
|                                                            | 68°C               | 2 min       |           |

**Table 5.** The HPLC analysis of the most efficient AOs (AO2, AO5, AO6, AO8, AO12, and AO13). All the AO samples were run on a Ion-Exchange HPLC using (1M NaClO<sub>4</sub>, 25mM Tris-HCl pH 8 and water) as mobile phase.

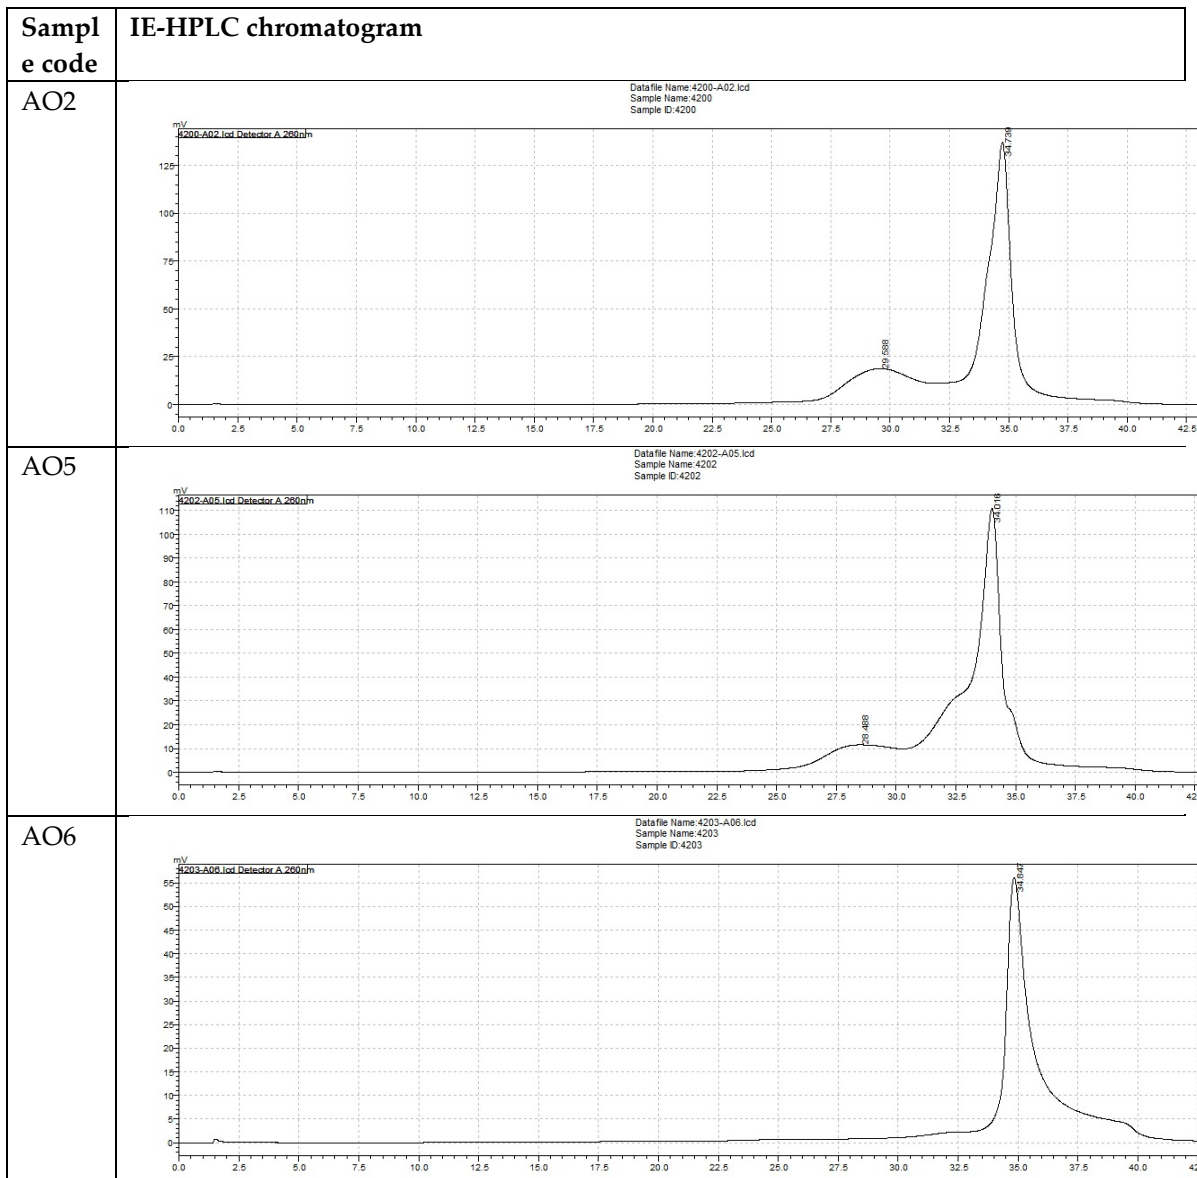

AO8

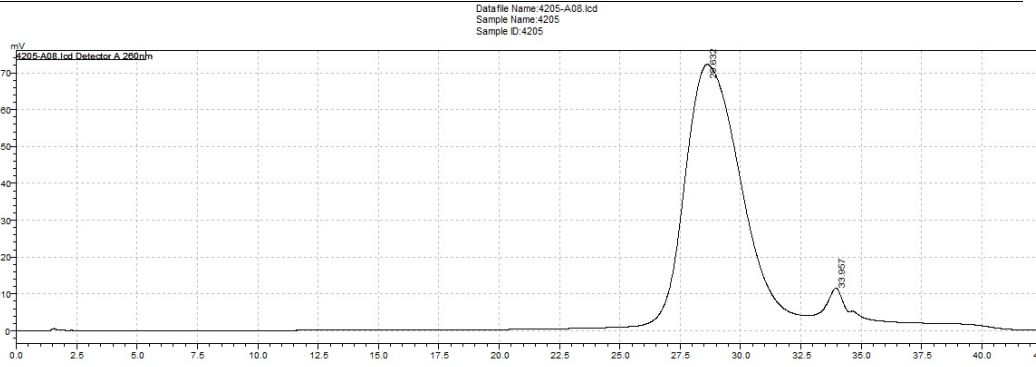

AO12

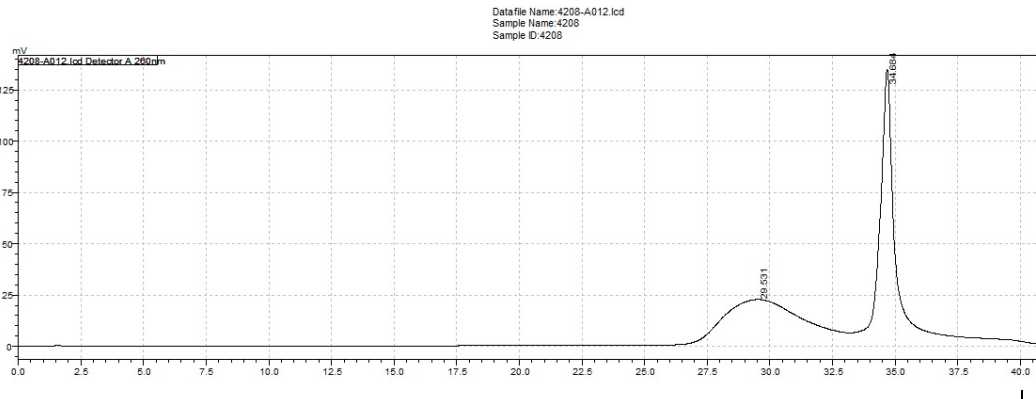

AO13

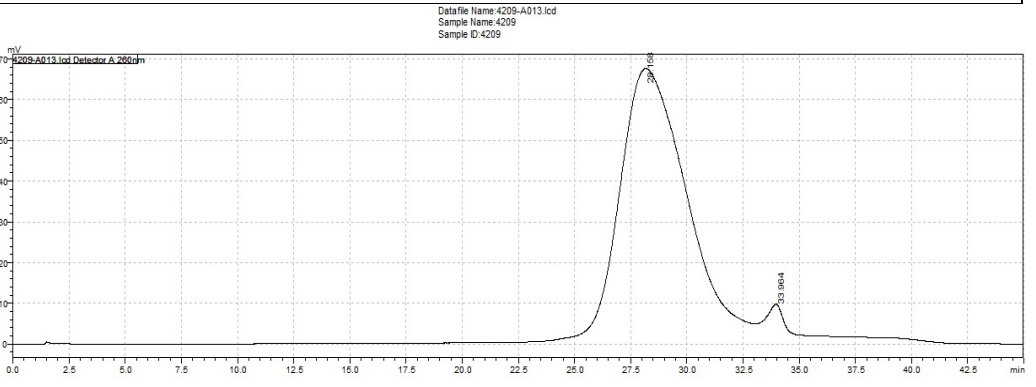

Supplement: genes-10-00705-s001.pdf [file genes-10-00705-s001.pdf]
